# Supplementary material
Source: PubMed Central journal article supplement (PMC7193252)
Supplement: NIHMS1580628-supplement-Suppl__Table_1__participant_demographics_.pdf [file NIHMS1580628-supplement-Suppl__Table_1__participant_demographics_.pdf]

Supplementary Table 1.

*Overall Demographic and Screening Data for Study Completers (N=30).*

|                                                     | Mean or N | SD   |
|-----------------------------------------------------|-----------|------|
| Age (years)                                         | 26.9      | 7.1  |
| Caucasian <sup>a</sup>                              | 21        | N/A  |
| Cigarettes/day <sup>b</sup>                         | 0.03      | 0.2  |
| Volume ECIG liquid used/day (ml) <sup>b</sup>       | 6.3       | 5.7  |
| Preferred Liquid concentration (mg/ml) <sup>b</sup> | 8.5       | 4.2  |
| Preferred PG concentration <sup>b</sup>             | 39.0      | 21.6 |
| Preferred VG concentration <sup>b</sup>             | 61.3      | 21.6 |
| Preferred Device Wattage <sup>b</sup>               | 54.7      | 42.9 |
| Duration ECIG use (months) <sup>b</sup>             | 16.6      | 12.3 |
| Fagerström TND <sup>c</sup>                         | 3.7       | 2.4  |
| Penn State Dependence <sup>d</sup>                  | 8.8       | 4.8  |

<sup>a</sup>Remaining participants were Asian (N=4), Black/African American (N=2), Other (N=2), and more than one race (N=1).

<sup>b</sup>According to self-report.

<sup>c</sup>The Fagerström Test for Nicotine Dependence: 0 (low dependence) to 10 (high dependence; Heatherton et al., 1986)

<sup>d</sup>Penn State Electronic Cigarette Dependence Index: 0 (low dependence) to 14 (high dependence; Foulds et al., 2015)
