# Supplementary material
Source: PubMed Central journal article supplement (PMC7193252)
Supplement: NIHMS1580628-supplement-Suppl__Table_2__Statistical_Results_.pdf [file NIHMS1580628-supplement-Suppl__Table_2__Statistical_Results_.pdf]

Supplementary Table 2.

*Statistical Analyses Results for Physiological and Subjective Measures.*

| Outcome measures                              | Condition (C)<br><i>F</i> | <i>p</i>  | $\eta^2_p$ | Time (T)<br><i>F</i> | <i>p</i>  | $\eta^2_p$ | <i>C</i> × <i>T</i><br><i>F</i> | <i>p</i>  | $\eta^2_p$ |
|-----------------------------------------------|---------------------------|-----------|------------|----------------------|-----------|------------|---------------------------------|-----------|------------|
| <b>Plasma Nicotine<sup>a</sup></b>            | 5.11                      | <.01*     | 0.15       | 32.81                | <.001*    | 0.53       | 1.41                            | <i>ns</i> | 0.05       |
| <b>Area Under the Curve<sup>b</sup></b>       | 5.14                      | <.01*     | 0.15       | 30.03                | <.001*    | 0.51       | 0.79                            | <i>ns</i> | 0.03       |
| <b>Heart Rate<sup>a</sup></b>                 | 1.62                      | <i>ns</i> | 0.05       | 48.27                | <.001*    | 0.63       | 0.97                            | <i>ns</i> | 0.03       |
| <b>Subjective Measures</b>                    |                           |           |            |                      |           |            |                                 |           |            |
| <i>Hughes-Hatsukami<sup>a</sup></i>           |                           |           |            |                      |           |            |                                 |           |            |
| Anxious                                       | 0.28                      | <i>ns</i> | 0.01       | 7.87                 | <.01*     | 0.21       | 1.18                            | <i>ns</i> | 0.04       |
| Craving                                       | 0.34                      | <i>ns</i> | 0.01       | 16.15                | <.001*    | 0.36       | 0.97                            | <i>ns</i> | 0.03       |
| Depression                                    | 0.69                      | <i>ns</i> | 0.02       | 3.06                 | <i>ns</i> | 0.10       | 0.96                            | <i>ns</i> | 0.03       |
| Difficulty Concentrating                      | 0.32                      | <i>ns</i> | 0.01       | 8.12                 | <.001*    | 0.22       | 0.89                            | <i>ns</i> | 0.03       |
| Drowsy                                        | 0.52                      | <i>ns</i> | 0.02       | 9.90                 | <.001*    | 0.26       | 1.32                            | <i>ns</i> | 0.04       |
| Hunger                                        | 2.73                      | <i>ns</i> | 0.09       | 6.83                 | <.01*     | 0.19       | 0.68                            | <i>ns</i> | 0.02       |
| Impatient                                     | 0.59                      | <i>ns</i> | 0.02       | 5.43                 | <.01*     | 0.16       | 1.04                            | <i>ns</i> | 0.04       |
| Irritable                                     | 0.42                      | <i>ns</i> | 0.01       | 3.73                 | <.05*     | 0.11       | 0.85                            | <i>ns</i> | 0.03       |
| Restless                                      | 0.73                      | <i>ns</i> | 0.02       | 2.89                 | <.05*     | 0.91       | 1.00                            | <i>ns</i> | 0.03       |
| Sweets                                        | 0.58                      | <i>ns</i> | 0.02       | 1.88                 | <i>ns</i> | 0.06       | 2.04                            | <i>ns</i> | 0.05       |
| Urge to Vape                                  | 0.70                      | <i>ns</i> | 0.02       | 15.97                | <.001*    | 0.36       | 0.71                            | <i>ns</i> | 0.02       |
| <i>Tiffany-Drobes QSU Brief<sup>a</sup></i>   |                           |           |            |                      |           |            |                                 |           |            |
| Factor 1 (Intention)                          | 0.74                      | <i>ns</i> | 0.03       | 19.65                | <.001*    | 0.40       | 1.15                            | <i>ns</i> | 0.04       |
| Factor 2 (Anticipation)                       | 3.04                      | <.05*     | 0.10       | 9.71                 | <.001*    | 0.25       | 1.11                            | <i>ns</i> | 0.04       |
| <i>Direct Effects of Nicotine<sup>a</sup></i> |                           |           |            |                      |           |            |                                 |           |            |
| Confused                                      | 2.30                      | <i>ns</i> | 0.07       | 0.65                 | <i>ns</i> | 0.02       | 1.17                            | <i>ns</i> | 0.04       |
| Dizzy                                         | 0.29                      | <i>ns</i> | 0.01       | 3.35                 | <.05*     | 0.10       | 0.57                            | <i>ns</i> | 0.02       |
| Headache                                      | 0.42                      | <i>ns</i> | 0.01       | 1.25                 | <i>ns</i> | 0.04       | 1.09                            | <i>ns</i> | 0.04       |
| Heart Pound                                   | 0.34                      | <i>ns</i> | 0.01       | 1.97                 | <i>ns</i> | 0.06       | 0.67                            | <i>ns</i> | 0.02       |
| Lightheaded                                   | 0.55                      | <i>ns</i> | 0.02       | 6.84                 | <.05*     | 0.19       | 1.09                            | <i>ns</i> | 0.04       |
| Nauseous                                      | 0.59                      | <i>ns</i> | 0.02       | 1.51                 | <i>ns</i> | 0.05       | 1.28                            | <i>ns</i> | 0.04       |
| Nervous                                       | 0.21                      | <i>ns</i> | 0.01       | 2.00                 | <i>ns</i> | 0.07       | 0.47                            | <i>ns</i> | 0.02       |
| Salivation                                    | 0.40                      | <i>ns</i> | 0.01       | 0.96                 | <i>ns</i> | 0.03       | 0.62                            | <i>ns</i> | 0.02       |
| Sweaty                                        | 1.08                      | <i>ns</i> | 0.04       | 1.29                 | <i>ns</i> | 0.04       | 0.64                            | <i>ns</i> | 0.02       |
| Weak                                          | 2.75                      | <i>ns</i> | 0.09       | 1.19                 | <i>ns</i> | 0.04       | 0.50                            | <i>ns</i> | 0.02       |
| <i>Direct Effects of Vaping<sup>c</sup></i>   |                           |           |            |                      |           |            |                                 |           |            |
| Awake                                         | 5.53                      | <.01*     | 0.16       | 3.77                 | <.01*     | 0.12       | 2.25                            | <.05*     | 0.07       |
| Calm                                          | 3.26                      | <.05*     | 0.10       | 7.32                 | <.001*    | 0.20       | 1.09                            | <i>ns</i> | 0.04       |
| Concentrate                                   | 5.03                      | <.01*     | 0.15       | 1.49                 | <i>ns</i> | 0.05       | 1.58                            | <i>ns</i> | 0.05       |
| Dizzy                                         | 2.90                      | <i>ns</i> | 0.09       | 5.00                 | <.01*     | 0.15       | 1.00                            | <i>ns</i> | 0.03       |
| Pleasant                                      | 6.94                      | <.01*     | 0.19       | 2.80                 | <.05*     | 0.09       | 0.71                            | <i>ns</i> | 0.02       |
| Reduce hunger                                 | 2.09                      | <i>ns</i> | 0.07       | 3.68                 | <.01*     | 0.11       | 0.66                            | <i>ns</i> | 0.02       |
| Right Now                                     | 0.11                      | <i>ns</i> | 0.01       | 14.65                | <.001*    | 0.34       | 0.41                            | <i>ns</i> | 0.01       |
| Satisfying                                    | 3.98                      | <.05*     | 0.12       | 4.70                 | <.01*     | 0.14       | 0.56                            | <i>ns</i> | 0.02       |
| Sick                                          | 0.49                      | <i>ns</i> | 0.02       | 0.16                 | <i>ns</i> | 0.01       | 0.81                            | <i>ns</i> | 0.03       |
| Taste Good                                    | 3.14                      | <.05*     | 0.10       | 0.93                 | <i>ns</i> | 0.03       | 0.69                            | <i>ns</i> | 0.02       |
| <i>Gen. Labeled Magnitude<sup>b</sup></i>     |                           |           |            |                      |           |            |                                 |           |            |
| Flavor                                        | 1.86                      | <i>ns</i> | 0.06       | 0.56                 | <i>ns</i> | 0.02       | 0.97                            | <i>ns</i> | 0.03       |
| Harshness                                     | 4.74                      | <.01*     | 0.14       | 0.92                 | <i>ns</i> | 0.03       | 0.82                            | <i>ns</i> | 0.03       |
| Throat Hit                                    | 11.47                     | <.001*    | 0.28       | 1.53                 | <i>ns</i> | 0.05       | 1.44                            | <i>ns</i> | 0.05       |

Note: *ns* = not significant.

<sup>a</sup>df C = (3,87); df T = (9,261); df C x T (27,783).

<sup>b</sup>df C = (3,87); df T = (1,29); df C x T (3,87).

<sup>c</sup>df C = (3,87); df T = (8,232); df C x T (24,696).
