# Supplementary material
Source: PubMed Central journal article supplement (PMC7193252)

# Area Under the Curve

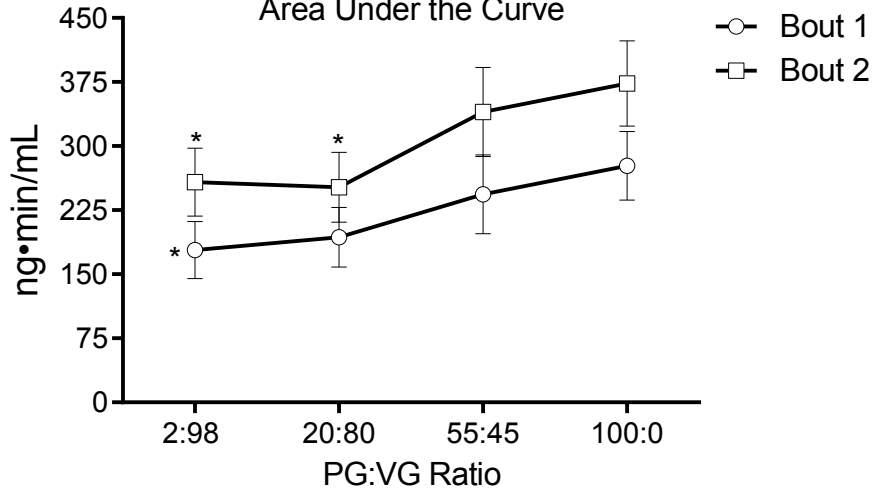

Supplement: NIHMS1580628-supplement-Suppl__Figure_1__AUC_for_plasma_nicotine_.pdf [file NIHMS1580628-supplement-Suppl__Figure_1__AUC_for_plasma_nicotine_.pdf]
